# Supplementary material for: Can an intact and crystalline octakis(methacryloxypropyl) silsesquioxane be prepared by hydrolysis-condensation of a trimethoxysilane precursor?
Source: Royal Society of Chemistry journal article supplement (doi:10.1039/c3ra46981f), 2014-01-01
Supplement: c3ra46981f.pdf [file c3ra46981f.pdf]

## Electronic Supplementary Information

# Can Intact and Crystalline Octakis(methacryloxypropyl) Silsesquioxane be Prepared by Hydrolysis-condensation of Trimethoxysilane Precursor?

**Jun Peng,<sup>a,b</sup> Kai Xu,<sup>a</sup> \* Hualun Cai,<sup>a</sup> \* Jiancheng Wu,<sup>a,b</sup> Weihong Lin,<sup>a,b</sup>  
Zhiwei Yu<sup>a,b</sup> and Mingcai Chen<sup>a</sup>**

\* Correspondence to Kai Xu, Guangzhou Institute of Chemistry, Chinese Academy of Sciences, P. O. BOX 1122, Guangzhou 510650, People's Republic of China. Email: xk@gic.ac.cn; Fax: +86 20 85231058; Tel: +86 20 85232302.

<sup>a</sup> Guangdong Provincial Key Laboratory of Organic Polymer Materials for Electronics, Guangzhou Institute of Chemistry, Chinese Academy of Sciences, P. O. BOX 1122, Guangzhou 510650, People's Republic of China.

<sup>b</sup> University of the Chinese Academy of Sciences, Beijing 100049, People's Republic of China.

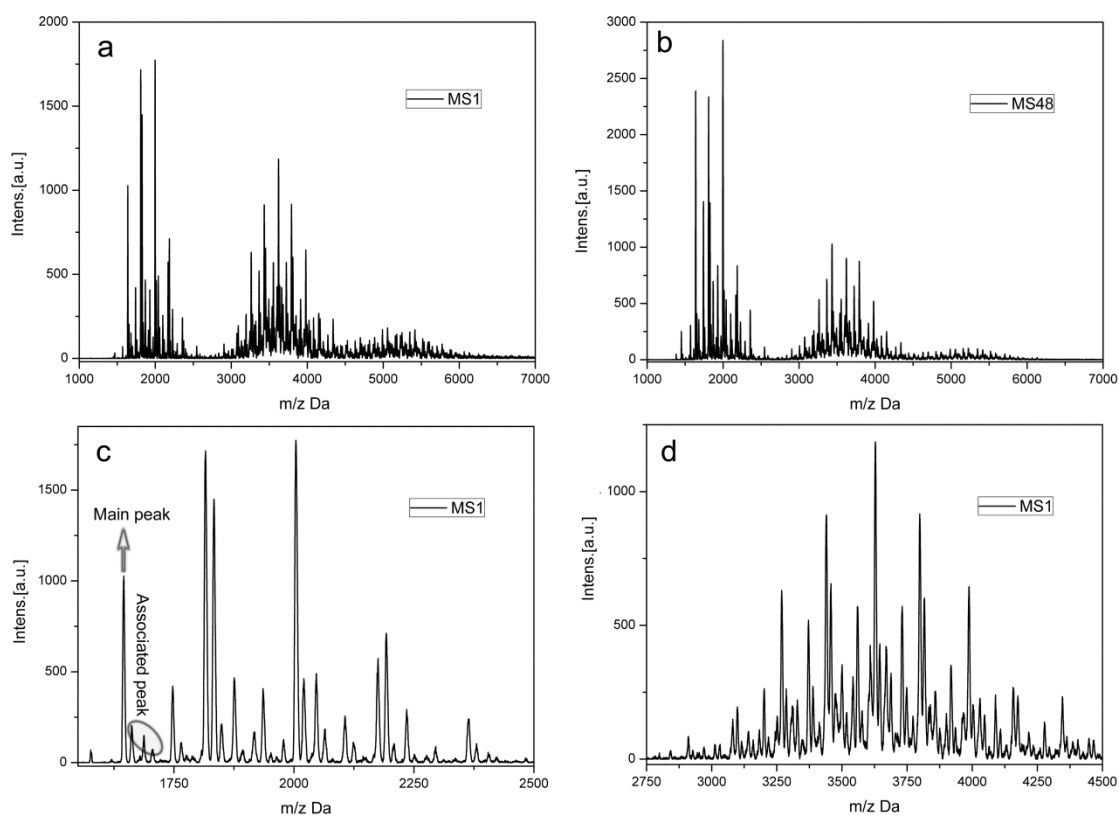

Figure S1. MALDI-TOF mass spectrum of MS1 (a) and MS48 (b) derived from the hydrolysis of (3-methacryloxypropyl)-trimethoxysilane, c and d were enlarged view of MS1 (a), MS1 and MS48 (the numeric suffix represented the hydrolysis time.)

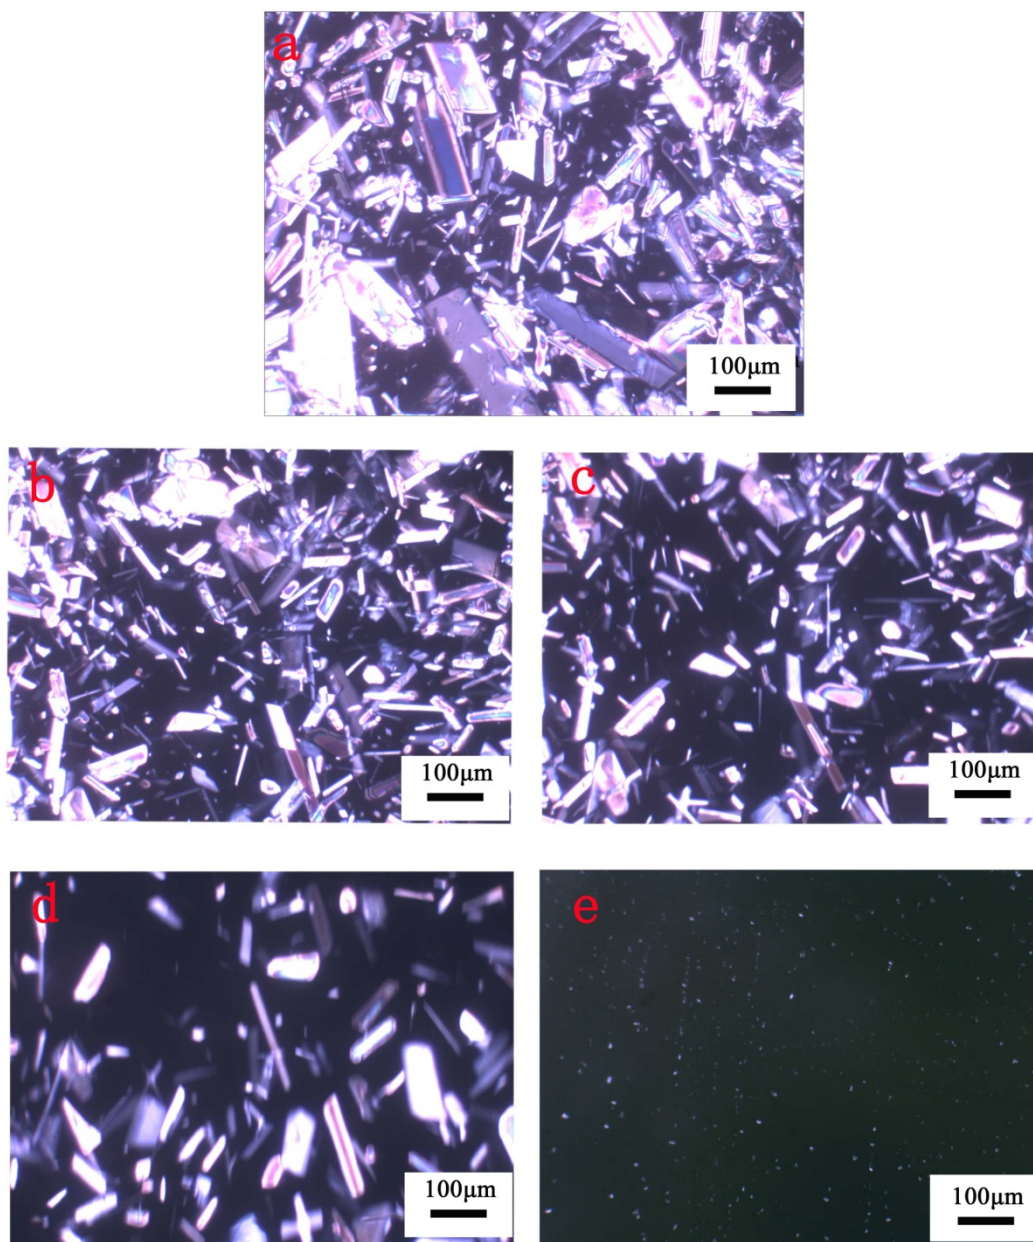

Figure S2. POM of CMSQ-T<sub>8</sub> with a heating rate of 1 °C/5 s, 20-60 °C (a), 62 °C (b), 64 °C (c), 68 °C (d), 72 °C (e).

Table S1. Assignment of peaks of MS MALDI-TOF mass spectrum, T represented [SiO<sub>1.5</sub>(CH<sub>2</sub>)<sub>3</sub>OCOCCH<sub>3</sub>CH<sub>2</sub>] section.

| MS Experimental and Predicted Values Corresponding to Ionization with Na <sup>+</sup> |                                                                                                   |          |                                                                                                   |
|---------------------------------------------------------------------------------------|---------------------------------------------------------------------------------------------------|----------|---------------------------------------------------------------------------------------------------|
| m/z(exp)                                                                              | Species (m/z)                                                                                     | m/z(exp) | Species (m/z)                                                                                     |
| 1645                                                                                  | T <sub>9</sub> (HO) <sub>1</sub> (1645)                                                           | 3099     | T <sub>17</sub> (HO) <sub>3</sub> (3097)                                                          |
| 1662                                                                                  | T <sub>9</sub> (HO) <sub>3</sub> (1663)                                                           | 3201     | T <sub>17</sub> [SiO <sub>1.5</sub> (CH <sub>2</sub> ) <sub>3</sub> (OH)](HO) <sub>2</sub> (3199) |
| 1687                                                                                  | T <sub>9</sub> (HO) <sub>5</sub> (1681)                                                           | 3268     | T <sub>18</sub> (HO) <sub>2</sub> (3267)                                                          |
| 1706                                                                                  | T <sub>9</sub> (HO) <sub>7</sub> (1699)                                                           | 3494     | T <sub>19</sub> (HO) <sub>7</sub> (3491)                                                          |
| 1747                                                                                  | T <sub>9</sub> [SiO <sub>1.5</sub> (CH <sub>2</sub> ) <sub>3</sub> (OH)](HO) <sub>1</sub> (1747)  | 3541     | T <sub>19</sub> (HO) <sub>13</sub> (3545)                                                         |
| 1765                                                                                  | T <sub>9</sub> [SiO <sub>1.5</sub> (CH <sub>2</sub> ) <sub>3</sub> (OH)](HO) <sub>3</sub> (1765)  | 3561     | T <sub>19</sub> (HO) <sub>15</sub> (3563)                                                         |
| 1816                                                                                  | T <sub>10</sub> (1815)                                                                            | 3609     | T <sub>20</sub> (3607)                                                                            |
| 1833                                                                                  | T <sub>10</sub> (HO) <sub>2</sub> (1833)                                                          | 3627     | T <sub>20</sub> (HO) <sub>2</sub> (3625)                                                          |
| 1849                                                                                  | T <sub>10</sub> (HO) <sub>4</sub> (1851)                                                          | 3645     | T <sub>20</sub> (HO) <sub>4</sub> (3643)                                                          |
| 1875                                                                                  | T <sub>10</sub> (HO) <sub>6</sub> (1869)                                                          | 3671     | T <sub>20</sub> (HO) <sub>6</sub> (3661)                                                          |
| 1892                                                                                  | T <sub>10</sub> (HO) <sub>8</sub> (1887)                                                          | 3689     | T <sub>20</sub> (HO) <sub>8</sub> (3679)                                                          |
| 1917                                                                                  | T <sub>10</sub> (HO) <sub>10</sub> (1905)                                                         | 3730     | T <sub>20</sub> (HO) <sub>14</sub> (3733)                                                         |
| 1935                                                                                  | T <sub>10</sub> [SiO <sub>1.5</sub> (CH <sub>2</sub> ) <sub>3</sub> (OH)](HO) <sub>1</sub> (1936) | 3749     | T <sub>20</sub> (HO) <sub>16</sub> (3751)                                                         |
| 1951                                                                                  | T <sub>10</sub> [SiO <sub>1.5</sub> (CH <sub>2</sub> ) <sub>3</sub> (OH)](HO) <sub>3</sub> (1954) | 3798     | T <sub>21</sub> (HO) <sub>1</sub> (3796)                                                          |
| 2004                                                                                  | T <sub>11</sub> (HO) <sub>1</sub> (2003)                                                          | 3815     | T <sub>21</sub> (HO) <sub>3</sub> (3814)                                                          |
| 2020                                                                                  | T <sub>11</sub> (HO) <sub>3</sub> (2021)                                                          | 3838     | T <sub>21</sub> (HO) <sub>5</sub> (3832)                                                          |
| 2040                                                                                  | T <sub>11</sub> (HO) <sub>5</sub> (2039)                                                          | 3859     | T <sub>21</sub> (HO) <sub>7</sub> (3850)                                                          |
| 2058                                                                                  | T <sub>11</sub> (HO) <sub>7</sub> (2057)                                                          | 3901     | T <sub>21</sub> (HO) <sub>13</sub> (3904)                                                         |
| 2106                                                                                  | T <sub>11</sub> [SiO <sub>1.5</sub> (CH <sub>2</sub> ) <sub>3</sub> (OH)] (2105)                  | 3918     | T <sub>21</sub> (HO) <sub>15</sub> (3922)                                                         |
| 2175                                                                                  | T <sub>12</sub> (2173)                                                                            | 3967     | T <sub>22</sub> (3966)                                                                            |
| 2124                                                                                  | T <sub>11</sub> [SiO <sub>1.5</sub> (CH <sub>2</sub> ) <sub>3</sub> (OH)](HO) <sub>2</sub> (2123) | 3988     | T <sub>22</sub> (HO) <sub>2</sub> (3984)                                                          |
| 2192                                                                                  | T <sub>12</sub> (HO) <sub>2</sub> (2191)                                                          | 4004     | T <sub>22</sub> (HO) <sub>4</sub> (4002)                                                          |
| 2208                                                                                  | T <sub>12</sub> (HO) <sub>4</sub> (2209)                                                          | 4029     | T <sub>22</sub> (HO) <sub>6</sub> (4020)                                                          |
| 2234                                                                                  | T <sub>12</sub> (HO) <sub>6</sub> (2226)                                                          | 4049     | T <sub>22</sub> (HO) <sub>8</sub> (4038)                                                          |
| 2250                                                                                  | T <sub>12</sub> (HO) <sub>8</sub> (2244)                                                          | 4088     | T <sub>22</sub> (HO) <sub>12</sub> (4072)                                                         |
| 2264                                                                                  | T <sub>12</sub> (HO) <sub>10</sub> (2262)                                                         | 4156     | T <sub>23</sub> (HO) <sub>1</sub> (4154)                                                          |
| 2280                                                                                  | T <sub>12</sub> (HO) <sub>12</sub> (2280)                                                         | 4345     | T <sub>24</sub> (HO) <sub>2</sub> (4342)                                                          |
| 3080                                                                                  | T <sub>17</sub> (HO) <sub>1</sub> (3079)                                                          |          |                                                                                                   |

Table S2. MM2 calculations of the minimization energies of CMSQ-T<sub>8</sub>, T<sub>10</sub> and T<sub>12</sub> cage silsesquioxanes.

| Energy Parameters* | T <sub>8</sub> | T <sub>10</sub> | T <sub>12</sub> |
|--------------------|----------------|-----------------|-----------------|
| Stretch            | 7.1618         | 51.2374         | 9.6608          |
| Bend               | 24.5503        | 135.7256        | 35.2502         |
| Stretch-Bend       | -0.1763        | 9.7302          | 0.5639          |
| Torsion            | -1.5293        | 3.9275          | 1.3665          |
| Non-1,4 VDW        | -39.3756       | -12.4928        | -68.9255        |
| 1,4 VDW            | 50.7130        | 93.8165         | 79.9198         |
| Dipole-Dipole      | 48.0409        | 48.8186         | 48.1490         |
| Total Energy       | 89.3848        | 330.7628        | 105.9847        |

\*Units of energy are kcal/mol
